# Supplementary material for: Non-Adherence to Antidepressant Treatment and Related Factors in a Region of Spain: A Population-Based Registry Study
Source: MDPI journal article supplement (doi:10.3390/pharmaceutics14122696), 2022-12-02
Supplement: s1 [file s1]

**Supplementary Table S1.** Antidepressants available in Castile and Leon.

| Antidepressant class                        | ATC Code | Drug           |
|---------------------------------------------|----------|----------------|
| Non-selective monoamine reuptake inhibitors | N06AA02  | Imipramine     |
|                                             | N06AA04  | Clomipramine   |
|                                             | N06AA06  | Trimipramine   |
|                                             | N06AA09  | Amitriptyline  |
|                                             | N06AA10  | Nortriptyline  |
|                                             | N06AA12  | Doxepine       |
|                                             | N06AA21  | Maprotiline    |
| Selective serotonin reuptake inhibitors     | N06AB03  | Fluoxetine     |
|                                             | N06AB04  | Citalopram     |
|                                             | N06AB05  | Paroxetine     |
|                                             | N06AB06  | Sertraline     |
|                                             | N06AB08  | Fluvoxamine    |
|                                             | N06AB10  | Escitalopram   |
| Monoamine oxidase A inhibitors              | N06AG02  | Moclobemide    |
| Other antidepressants                       | N06AX03  | Mianserin      |
|                                             | N06AX05  | Trazodone      |
|                                             | N06AX11  | Mirtazapine    |
|                                             | N06AX12  | Bupropion      |
|                                             | N06AX14  | Tianeptine     |
|                                             | N06AX16  | Venlafaxine    |
|                                             | N06AX18  | Reboxetine     |
|                                             | N06AX21  | Duloxetine     |
|                                             | N06AX22  | Agomelatine    |
|                                             | N06AX23  | Desvenlafaxine |
|                                             | N06AX26  | Vortioxetine   |

Abbreviations: ATC; Anatomical, Therapeutical and Chemical Classification.

**Supplementary Table S2.** Population characteristics distribution across adherence levels to antidepressants in Castile and Leon.

| Adherence level                                | Non-adherent     |                  |                     | Adherent            |
|------------------------------------------------|------------------|------------------|---------------------|---------------------|
|                                                | None (<20)       | Poor (20 - 49)   | Moderate (50 - 79)  | (≥ 80)              |
| <b>Total</b>                                   | 0.39 (0.36-0.41) | 3.47 (3.39-3.55) | 16.01 (15.86-16.17) | 80.13 (79.96-80.3)  |
| <b>Sociodemographic characteristics</b>        |                  |                  |                     |                     |
| <i>Sex</i>                                     |                  |                  |                     |                     |
| Male                                           | 0.44 (0.41-0.47) | 3.66 (3.58-3.74) | 16.47 (16.31-16.63) | 79.44 (79.26-79.61) |
| Female                                         | 0.36 (0.34-0.39) | 3.39 (3.32-3.47) | 15.83 (15.68-15.99) | 80.41 (80.24-80.58) |
| <i>Age group</i>                               |                  |                  |                     |                     |
| 0 - 17                                         | 0.62 (0.59-0.65) | 5.32 (5.22-5.42) | 26.06 (25.88-26.25) | 68 (67.8-68.2)      |
| 18 - 64                                        | 0.55 (0.51-0.58) | 4.72 (4.63-4.81) | 20.26 (20.09-20.44) | 74.47 (74.28-74.66) |
| 65 - 79                                        | 0.26 (0.24-0.28) | 2.61 (2.54-2.67) | 12.93 (12.79-13.07) | 84.21 (84.05-84.36) |
| ≥ 80                                           | 0.23 (0.21-0.25) | 2.1 (2.04-2.16)  | 11.43 (11.3-11.57)  | 86.24 (86.09-86.39) |
| <i>Institutionalized</i>                       | 0.15 (0.13-0.16) | 1.87 (1.81-1.92) | 11.6 (11.46-11.74)  | 86.39 (86.24-86.53) |
| <i>Urbanicity</i>                              | 0.4 (0.38-0.43)  | 3.71 (3.63-3.79) | 16.81 (16.65-16.97) | 79.08 (78.9-79.25)  |
| <b>Health related characteristics (95% CI)</b> |                  |                  |                     |                     |
| <i>Polypharmacy (≥ 5 drugs)</i>                | 0.37 (0.35-0.4)  | 3.14 (3.06-3.21) | 14.92 (14.77-15.07) | 81.57 (81.4-81.73)  |
| <i>Multiple prescribers (≥ 3)</i>              | 0.35 (0.32-0.38) | 3.21 (3.12-3.31) | 15.62 (15.43-15.82) | 80.81 (80.6-81.02)  |
| <i>Antidepressant class</i>                    |                  |                  |                     |                     |
| TCA                                            | 0.6 (0.57-0.63)  | 4.88 (4.79-4.97) | 18.51 (18.34-18.67) | 76.01 (75.83-76.2)  |
| SSRI                                           | 0.32 (0.3-0.34)  | 3.31 (3.23-3.38) | 16.56 (16.4-16.72)  | 79.81 (79.64-79.99) |
| Other antidepressants                          | 0.35 (0.32-0.37) | 2.84 (2.77-2.91) | 15.32 (15.17-15.47) | 81.5 (81.33-81.66)  |
| <b>Mental health diagnostics (95% CI)</b>      |                  |                  |                     |                     |
| <i>Pain (different etiologies)</i>             | 0.69 (0.65-0.72) | 5.39 (5.3-5.49)  | 18.73 (18.56-18.89) | 75.19 (75.01-75.38) |
| <i>Anxiety</i>                                 | 0.38 (0.36-0.41) | 3.76 (3.68-3.84) | 17.4 (17.24-17.57)  | 78.45 (78.28-78.63) |
| <i>Depression and Anxiety</i>                  | 0.34 (0.32-0.37) | 2.99 (2.92-3.07) | 16.13 (15.98-16.29) | 80.53 (80.36-80.7)  |
| <i>Depression</i>                              | 0.31 (0.29-0.33) | 2.98 (2.9-3.05)  | 14.54 (14.39-14.69) | 82.17 (82.01-82.33) |
| <i>Other psychiatric diagnoses</i>             | 0.34 (0.31-0.36) | 2.66 (2.59-2.73) | 14.75 (14.6-14.9)   | 82.25 (82.08-82.41) |

Abbreviations: 95% CI, confidence interval, SSRIs, Selective Serotonin Reuptake Inhibitors; TCAs: Tricyclic Antidepressants.
